# Supplementary material for: Plotting a future for Amazonian canga vegetation in a campo rupestre context
Source: PubMed Central journal article supplement (PMC6681939; doi:10.1371/journal.pone.0219753), 2019-08-05
Supplement: pone.0219753.s003.pdf [file pone.0219753.s003.pdf]

# Rarefied, extrapolated and estimated richness of plant species in the canga of Carajás

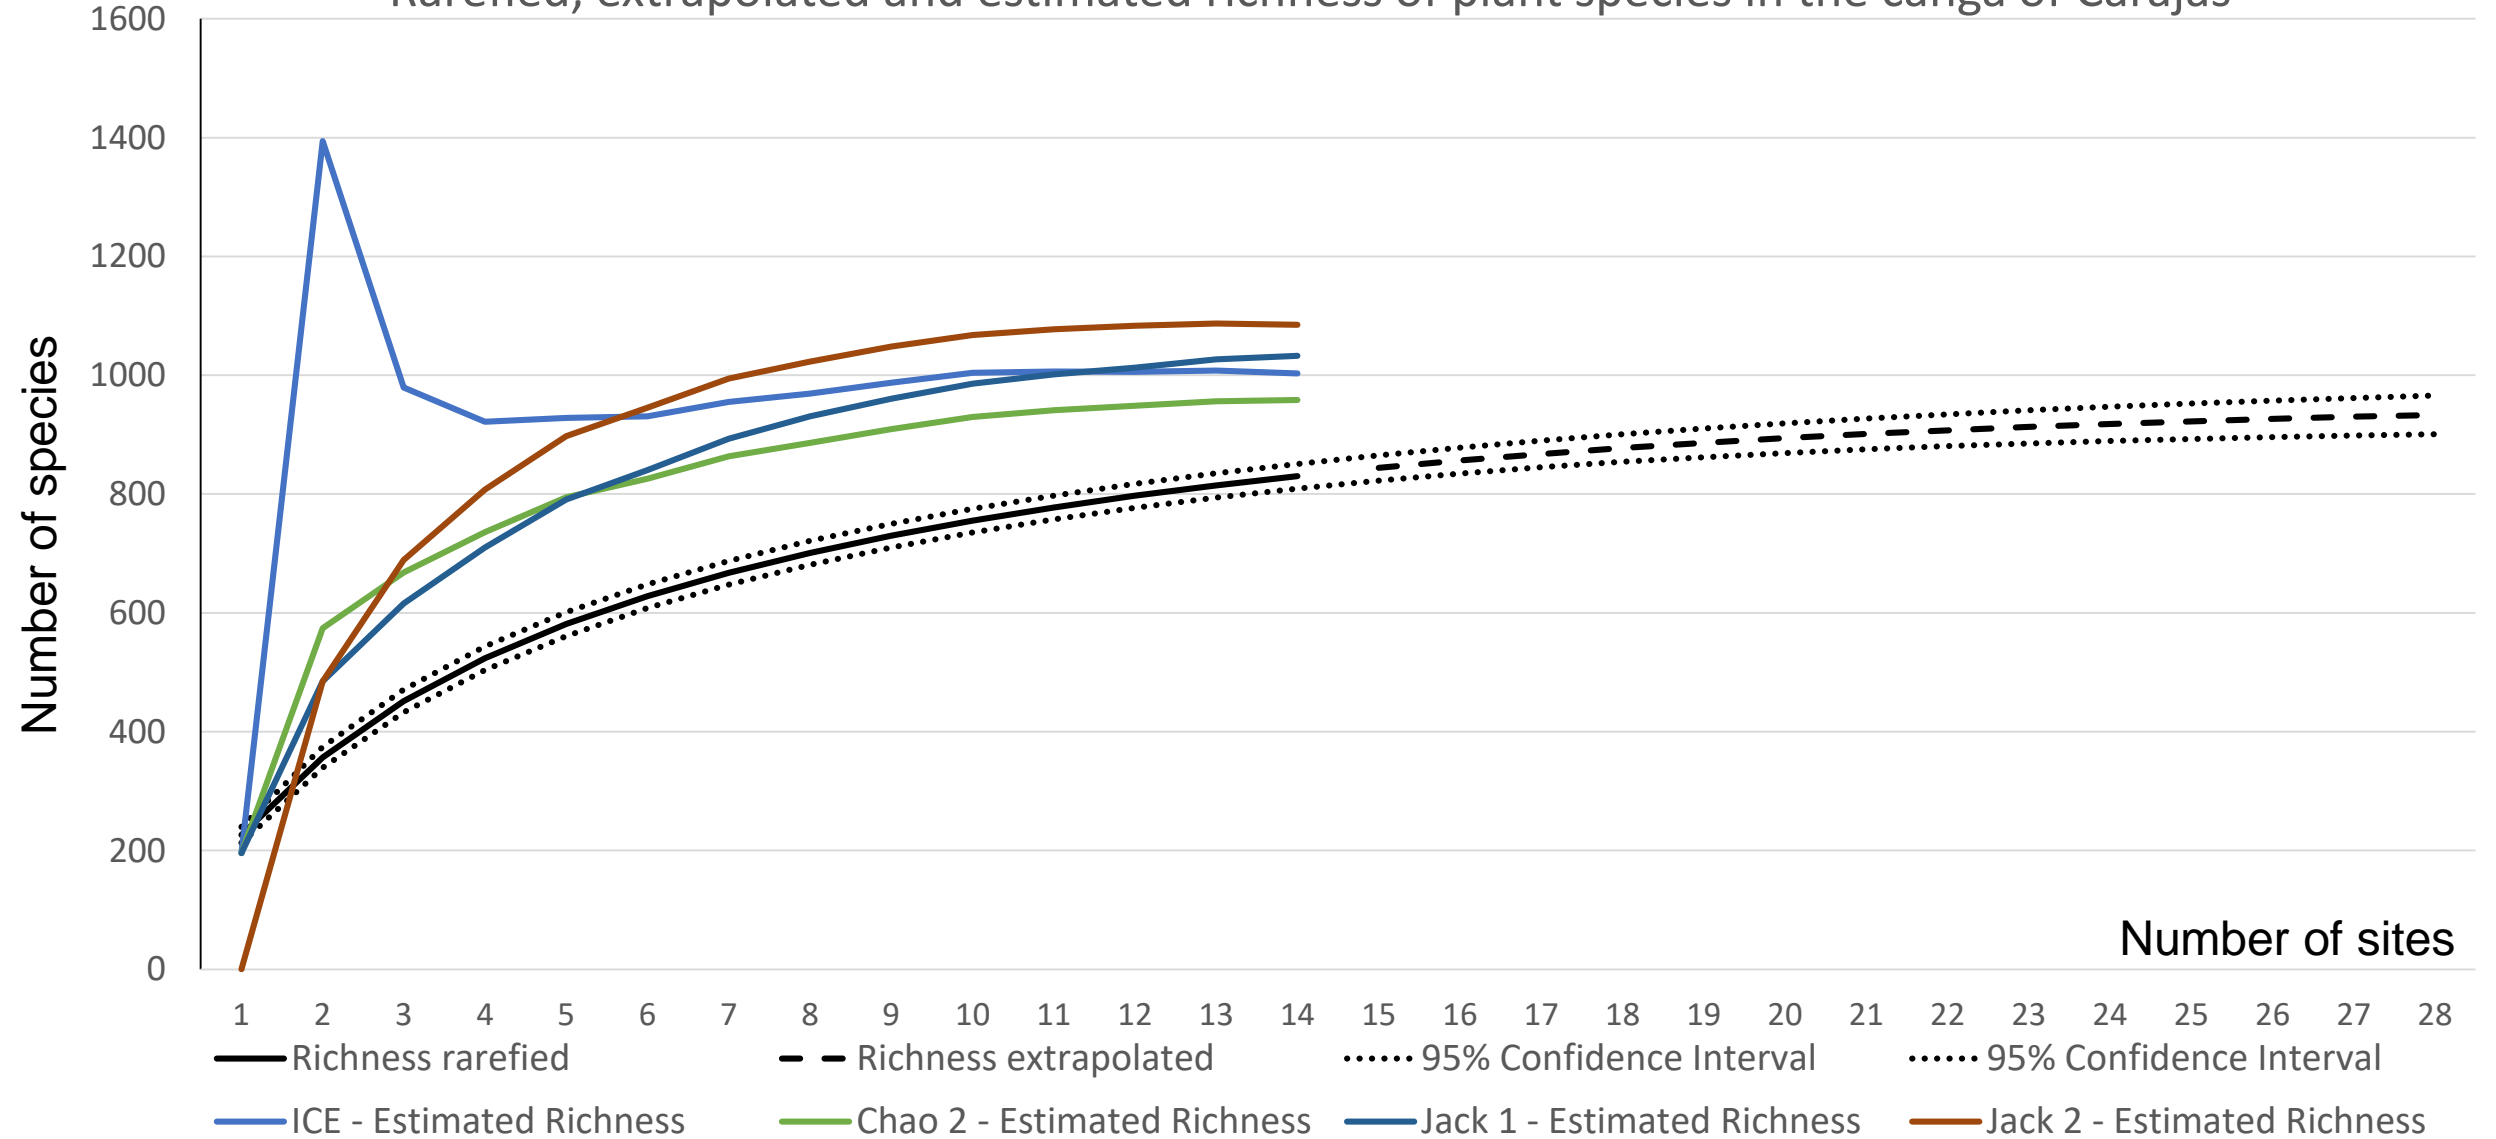

Rarefied (interpolated), extrapolated and estimated richness for flora sampling in individual mountaintops with canga in Carajás. 830 native species were recorded in 14 sites, while a total of 933 species are expected if sampling is extended to include a total of 28 sites. Total asymptotic estimated richness varies from 958 to 1085 species.
